# Supplementary material for: The Initial Impact of the Coronavirus Disease 2019 Pandemic on ICU Family Engagement: Lessons Learned From a Collaborative of 27 ICUs
Source: PubMed Central journal article supplement — Crit Care Explor. 2021 Apr 2;3(4):e0401. doi: 10.1097/CCE.0000000000000401 (PMC8021347; doi:10.1097/cce.0000000000000401), 2021-04-02
Supplement: cc9-3-e0401-s001.pdf [file cc9-3-e0401-s001.pdf]

**Supplemental Digital Content 1.** Family Engagement Collaborative introductory webinars

|                                                                 |
|-----------------------------------------------------------------|
| <b>Introductory webinar topics</b>                              |
| SCCM Family Engagement Collaborative “Kick-Off”                 |
| A Family Advisor’s Perspective                                  |
| The SCCM Family-Centered Care Guidelines and Gap Analysis Tool  |
| Implementing Family-Centered Rounds                             |
| Implementing Structured Family Care Conferences                 |
| Creating and Disseminating Informational Materials for Families |
| Selecting an Appropriate Method for Assessing Project Impact    |
