# Supplementary material for: The Initial Impact of the Coronavirus Disease 2019 Pandemic on ICU Family Engagement: Lessons Learned From a Collaborative of 27 ICUs
Source: PubMed Central journal article supplement — Crit Care Explor. 2021 Apr 2;3(4):e0401. doi: 10.1097/CCE.0000000000000401 (PMC8021347; doi:10.1097/cce.0000000000000401), 2021-04-02
Supplement: cc9-3-e0401-s002.pdf [file cc9-3-e0401-s002.pdf]

**Supplemental Digital Content 2.** List of FEC Sites and Selected Family Engagement Projects

| <b>Hospital</b>                                                 | <b>Location</b>    | <b>Type of unit</b> | <b>Selected project</b>                                        |
|-----------------------------------------------------------------|--------------------|---------------------|----------------------------------------------------------------|
| Arkansas Children's Hospital                                    | Little Rock, AR    | Med/Surg Combined   | Orientation Video                                              |
| Baystate Medical Center                                         | Springfield, MA    | Med/Surg Combined   | Family presence during resuscitation                           |
| Billings Clinic                                                 | Billings, MT       | Med/Surg Combined   | Family Care Conference Communications                          |
| Charleston Area Medical Center                                  | Charleston, WV     | Surgical            | ICU diaries                                                    |
| Children's Hospital of Alabama                                  | Birmingham, AL     | Med/Surg Combined   | ICU diaries                                                    |
| Children's Hospital of Philadelphia                             | Philadelphia, PA   | Med/Surg Combined   | Orientation Packet                                             |
| Cleveland Clinic Main Campus                                    | Cleveland, OH      | Medical             | ICU diaries                                                    |
| Greater Baltimore Medical Center                                | Towson, MD         | Med/Surg Combined   | Family-centered rounds & Family Care Conference Communications |
| Hackensack Meridian Health Hackensack University Medical Center | Hackensack, NJ     | Surgical            | Family Care Conference Communications                          |
| The University of Texas Medical Branch                          | Galveston, TX      | Surgical            | Orientation Packet & Family packet/educational programs        |
| Kettering Medical Center                                        | Kettering, OH      | Med/Surg Combined   | ICU diaries & Family Care Conference Communications            |
| Intermountain Medical Center                                    | Salt Lake City, UT | Med/Surg Combined   | Standardized therapy protocols for patients on ventilation     |
| Mayo Medical Center                                             | Phoenix, AZ        | Med/Surg Combined   | Family-Centered Rounds                                         |
| Weill Cornell Medical College                                   | New York, NY       | Med/Surg Combined   | ICU diaries                                                    |
| Northeast Georgia Health System                                 | Gainesville, GA    | Medical             | Orientation Video & Orientation Packet                         |
| Northeast Methodist Hospital                                    | San Antonio, TX    | Med/Surg Combined   | Orientation Video & ICU diaries & Orientation Packet           |

|                                                  |                       |                       |                                       |
|--------------------------------------------------|-----------------------|-----------------------|---------------------------------------|
| Northwestern Memorial Hospital                   | Chicago, IL           | Cardiac               | Family Care Conference Communications |
| Northwestern Memorial Hospital                   | Chicago, IL           | Medical               | Orientation Packet                    |
| Riley Hospital for Children                      | Indianapolis, IN      | Med/Surg Combined     | Orientation Packet                    |
| Ronald Regan UCLA Medical Center                 | Los Angeles, CA       | Cardiac               | Orientation Video                     |
| Rush University Medical Center                   | Chicago, IL           | Medical               | Written summaries for families        |
| Seoul National University Bundang Hospital       | Seongnam, South Korea | Medical               | Family-Centered Rounds                |
| Texas Children's Hospital                        | Houston, TX           | Med/Surgical Combined | Family presence during resuscitation  |
| University of Maryland Medical Center            | Baltimore, MD         | Neuro                 | Family-Centered Rounds                |
| University of Maryland St. Joseph Medical Center | Towson, MD            | Med/Surg Combined     | Standardized Protocol for WLST        |
| Washington Hospital Healthcare System            | Fremont, CA           | Med/Surg Combined     | Family Care Conference Communications |
| Yale New Haven Hospital                          | New Haven, CT         | Neuro                 | Orientation Video                     |
