# Supplementary material for: The Initial Impact of the Coronavirus Disease 2019 Pandemic on ICU Family Engagement: Lessons Learned From a Collaborative of 27 ICUs
Source: PubMed Central journal article supplement — Crit Care Explor. 2021 Apr 2;3(4):e0401. doi: 10.1097/CCE.0000000000000401 (PMC8021347; doi:10.1097/cce.0000000000000401), 2021-04-02
Supplement: cc9-3-e0401-s003.pdf [file cc9-3-e0401-s003.pdf]

### Supplemental Digital Content 3. Survey questions

Site #:

Q1: What kinds of requirements were listed in your hospital's general visitor restriction policy when it was at its most restrictive?

- Visitors are not permitted to visit patients in the hospital under any circumstance
  - Visitors are not permitted to visit patients in the hospital aside from a few exceptions
  - Visitors are not permitted to visit patients unless they are wearing masks and/or other PPE
  - Visitors simply must not have been exposed to COVID-19 or have symptoms of it
  - Visitors simply must not be sick in general
- 

Q2: What kinds of exceptions did the visitor restriction policy allow for, if any, when it was at its most restrictive? Check all that apply.

- Exceptions to visitor restrictions exist for end-of-life care
- Exceptions to visitor restrictions exist for pediatric and/or neonatal care
- Exceptions to visitor restrictions exist for obstetric care
- Exceptions to visitor restrictions exist for patients with psychiatric conditions
- Exceptions to visitor restrictions are made for patients who lack decisional capacity
- Exceptions to visitor restrictions are made for patients with intellectual and/or developmental disabilities
- Exceptions to visitor restrictions are made for patients undergoing surgical procedures
- Other exceptions apply \_\_\_\_\_

Q2A: If you checked any of the above, please describe what allowances your hospital made for each exception \_\_\_\_\_

Q3: What kinds of requirements are still listed in your hospital's general visitor restriction policy currently?

- Visitors are not permitted to visit patients in the hospital under any circumstance
- Visitors are not permitted to visit patients in the hospital aside from a few exceptions
- Visitors are not permitted to visit patients unless they are wearing masks and/or other PPE
- Visitors simply must not have been exposed to COVID-19 or have symptoms of it
- Visitors simply must not be sick in general

Q4: What kinds of exceptions does your hospital's visitor restriction policy allow for at this point, if any, currently? Check all that apply.

- Exceptions to visitor restrictions exist for end-of-life care
- Exceptions to visitor restrictions exist for pediatric and/or neonatal care
- Exceptions to visitor restrictions exist for obstetric care
- Exceptions to visitor restrictions exist for patients with psychiatric conditions
- Exceptions to visitor restrictions are made for patients who lack decisional capacity
- Exceptions to visitor restrictions are made for patients with intellectual and/or developmental disabilities
- Exceptions to visitor restrictions are made for patients undergoing surgical procedures
- Other exceptions apply \_\_\_\_\_

Q4A: If you checked any of the above, please describe what allowances your hospital made for each exception \_\_\_\_\_

---

Q5: Is your ICU staff using video conferencing technology (e.g., FaceTime, Zoom, etc.) to communicate with patients' families?

Yes

No

---

Q5A: If yes, what devices are your staff using for video conferencing?

Devices provided by the ICU or the hospital for staff to use

a) If checked: How many devices? \_\_\_\_\_

b) If checked: How many beds is your unit? \_\_\_\_\_

c) If checked: Are the devices encrypted? y/n

Staff's personal devices (e.g., personal smartphones, etc.)

Both

Q6: How does your site screen for COVID positive or sick visitors among those who are allowed to visit under your current policy? Check all that may apply.

The hospital provides a temperature test for all incoming visitors.

The hospital provides a self-report questionnaire for all incoming visitors to indicate if they have been around a COVID patient or have been having symptoms and/or are feeling sick.

The hospital provides on-site COVID testing for all incoming visitors.

Other screening applies: \_\_\_\_\_

Our site's current policy does not allow visitors

---

Q7: Does the hospital provide masks and other PPE to all allowed visitors?

- Yes, the hospital provides this for all visitors
  - Yes, but only for visitors in particular units and/or patients under certain circumstances
    - a) If checked: Please describe the circumstances \_\_\_\_\_
  - No, visitors must bring their own PPE
  - Our site's current policy does not allow visitors
- 

Q8. Has your hospital given your staff an estimate as to when visitor restriction policies will be relaxed further? y/n

Q8A: If yes, what is the timeframe for these policies to be lifted?

- In the next few weeks
- In the next few months
- Beyond the next few months

Q8B: If yes, can you describe the plan that has been shared? \_\_\_\_\_

Q9: Would you be willing to share an electronic copy of your hospital's current visitor restriction policy?

Q10: Please briefly describe the project that you had been planning for the collaborative

---

Q11: Did you have to stop your project at your site?

Yes

No

Q12: For the collaborative project that you selected for your site, are you planning to continue it in the future?

Yes, we are planning to continue it

No, we are not planning to continue it

We are currently unsure

---

Q13: Do you have any ideas for ways to engage ICU families in the midst of visitor restrictions that you'd be willing to share? Please describe.

Q14: From 0-10, how helpful did you find the collaborative, up until now?

- 0 Not helpful
- 1
- 2
- 3
- 4
- 5
- 6
- 7
- 8
- 9
- 10 Very helpful

---

Q15: What suggestions, if any, do you have to improve the collaborative experience?

---
