# Supplementary material for: The Initial Impact of the Coronavirus Disease 2019 Pandemic on ICU Family Engagement: Lessons Learned From a Collaborative of 27 ICUs
Source: PubMed Central journal article supplement — Crit Care Explor. 2021 Apr 2;3(4):e0401. doi: 10.1097/CCE.0000000000000401 (PMC8021347; doi:10.1097/cce.0000000000000401), 2021-04-02
Supplement: cc9-3-e0401-s004.pdf [file cc9-3-e0401-s004.pdf]

**Supplemental Digital Content 4.** Demographic data for FS-ICU 24R survey respondents (n=212)

| <b>Variable</b>                                    | <b>n (%)</b> |
|----------------------------------------------------|--------------|
| Gender, n=191                                      |              |
| Male                                               | 58 (30.4)    |
| Female                                             | 132 (69.1)   |
| Other                                              | 1 (0.5)      |
| Age, mean (SD), n=172                              | 48.7 (17.0)  |
| Relationship to patient, n=176                     |              |
| Spouse/partner                                     | 45 (25.6)    |
| Parent                                             | 60 (34.1)    |
| Child                                              | 40 (22.7)    |
| Sibling/other                                      | 31 (17.6)    |
| Previous experience in ICU, yes, n=182             | 102 (56.0)   |
| Lives with patient, yes, n=185                     | 116 (62.7)   |
| If not, how often do you see patient, n=65         |              |
| More than weekly                                   | 16 (24.6)    |
| Weekly                                             | 27 (41.5)    |
| Monthly                                            | 14 (21.5)    |
| Yearly                                             | 6 (9.2)      |
| Less than once a year                              | 2 (3.1)      |
| Location, in-town where hospital is located, n=187 | 63 (33.7)    |
| Education, n=179                                   |              |
| Did not complete secondary school or high school   | 7 (3.9)      |
| Completed secondary or high school                 | 41 (22.9)    |
| Had some university education                      | 59 (33.0)    |
| University degree                                  | 38 (21.2)    |
| Graduate degree                                    | 34 (19.0)    |
