# Supplementary material for: The Initial Impact of the Coronavirus Disease 2019 Pandemic on ICU Family Engagement: Lessons Learned From a Collaborative of 27 ICUs
Source: PubMed Central journal article supplement — Crit Care Explor. 2021 Apr 2;3(4):e0401. doi: 10.1097/CCE.0000000000000401 (PMC8021347; doi:10.1097/cce.0000000000000401), 2021-04-02
Supplement: cc9-3-e0401-s005.pdf [file cc9-3-e0401-s005.pdf]

**Supplemental Digital Content 5.** Mean FS-ICU 24R item and composite scores (n=212)

| <b>Item</b>                                                                            | <b>Mean score (SD)</b> |
|----------------------------------------------------------------------------------------|------------------------|
| <i>Satisfaction with care</i>                                                          |                        |
| Satisfaction with concern and caring by ICU staff, n=207                               | 90.9 (15.4)            |
| How well did the ICU staff assess and treat your family member's pain, n=208           | 89.0 (17.9)            |
| How well did the ICU staff assess and treat your family member's breathlessness, n=203 | 91.3 (15.6)            |
| How well did the ICU staff assess and treat your family member's agitation, n=205      | 84.9 (21.7)            |
| How well did the ICU staff show an interest in your needs, n=205                       | 86.6 (21.3)            |
| How well did the ICU staff provide emotional support to you, n=203                     | 84.6 (22.1)            |
| How was the teamwork of all the ICU staff who took care of your family member, n=206   | 88.4 (17.9)            |
| How was the courtesy, respect and compassion you were given, n=205                     | 89.2 (16.7)            |
| How well the nurses cared for your family member, n=204                                | 91.7 (15.2)            |
| How often did the nurses communicate to you about your family members condition, n=202 | 89.6 (18.2)            |
| How well doctors cared for your family member, n=206                                   | 89.0 (17.2)            |
| How satisfied are you with the atmosphere (mood) in the ICU waiting room, n=206        | 77.8 (25.5)            |
| How satisfied are you with the atmosphere (mood) of the ICU, n=206                     | 86.2 (18.6)            |
| How satisfied are you with your participation in daily rounds, n=205                   | 84.6 (22.3)            |
| How satisfied are you with your participation in the care of your                      |                        |

|                                                                                                                                                                                                               |             |
|---------------------------------------------------------------------------------------------------------------------------------------------------------------------------------------------------------------|-------------|
| critically ill family member, n=204                                                                                                                                                                           | 89.3 (17.5) |
| Some people want everything done for their health problems while others do not want a lot done. How satisfied were you with the LEVEL or amount of health care your family member received in the ICU?, n=206 | 88.8 (18.4) |
| <i>Satisfaction with decision-making</i>                                                                                                                                                                      |             |
| How often did doctors communicate to you about your family member's condition, n=207                                                                                                                          | 82.7 (23.3) |
| Willingness of ICU staff to answer your questions, n=208                                                                                                                                                      | 85.9 (21.7) |
| How well ICU staff provided you with explanations that you understood, n=205                                                                                                                                  | 88.2 (17.3) |
| The honesty of information provided to you about your family member's condition, n=207                                                                                                                        | 89.3 (16.2) |
| How well ICU staff informed you what was happening to your family member and why things were being done, n=205                                                                                                | 85.9 (19.6) |
| The consistency of information provided to you about your family member's condition, n=206                                                                                                                    | 88.9 (18.0) |
| How included or excluded did you feel in the decision-making process, n=200                                                                                                                                   | 85.8 (24.7) |
| How supported did you feel during the decision-making process, n=195                                                                                                                                          | 86.9 (18.4) |
| Did you feel you had control over the care of your family member, n=199                                                                                                                                       | 86.4 (20.8) |

|                                                                                                                 |             |
|-----------------------------------------------------------------------------------------------------------------|-------------|
| When making decisions, did you have adequate time to have your concerns addressed and questions answered, n=192 | 81.9 (23.1) |
| <i>Composite FS-ICU scores</i>                                                                                  |             |
| Satisfaction with Care                                                                                          | 87.5 (15.1) |
| Decision Making                                                                                                 | 86.1 (15.4) |
| Total                                                                                                           | 87.0 (14.5) |

\*All data reflects US sites.
