# Supplementary material for: The Initial Impact of the Coronavirus Disease 2019 Pandemic on ICU Family Engagement: Lessons Learned From a Collaborative of 27 ICUs
Source: PubMed Central journal article supplement — Crit Care Explor. 2021 Apr 2;3(4):e0401. doi: 10.1097/CCE.0000000000000401 (PMC8021347; doi:10.1097/cce.0000000000000401), 2021-04-02
Supplement: cc9-3-e0401-s006.pdf [file cc9-3-e0401-s006.pdf]

**Supplemental Digital Content 6.** Demographic data for IPFCC Clinician Inventory respondents (n=346)

| <b>Variable</b>                                            | <b>n (%), except where indicated</b> |
|------------------------------------------------------------|--------------------------------------|
| Age, mean (SD), n=338                                      | 36.0 (10.3)                          |
| Sex                                                        |                                      |
| Male                                                       | 84 (24.3)                            |
| Female                                                     | 255 (73.7)                           |
| Prefer not to answer                                       | 7 (2.0)                              |
| Clinical role, n=313                                       |                                      |
| Nurse                                                      | 177 (56.5)                           |
| Advanced Practice Nurse                                    | 55 (17.6)                            |
| Therapist                                                  | 42 (13.4)                            |
| Physician                                                  | 19 (6.1)                             |
| Physician Assistant                                        | 18 (5.8)                             |
| Pharmacist                                                 | 2 (0.6)                              |
| Other                                                      | 0                                    |
| Years working in critical care unit, mean (SD), n=344      | 9.7 (9.0)                            |
| Years working in this critical care unit, mean (SD), n=346 | 8.1 (27.5)                           |
