# Supplementary material for: The Initial Impact of the Coronavirus Disease 2019 Pandemic on ICU Family Engagement: Lessons Learned From a Collaborative of 27 ICUs
Source: PubMed Central journal article supplement — Crit Care Explor. 2021 Apr 2;3(4):e0401. doi: 10.1097/CCE.0000000000000401 (PMC8021347; doi:10.1097/cce.0000000000000401), 2021-04-02
Supplement: cc9-3-e0401-s007.pdf [file cc9-3-e0401-s007.pdf]

**Supplemental Digital Content 7. IPFCC Clinician Inventory responses (n=346)**

| Variable                                                                                                                                                                                                                                                                                                                                                                                                                                                                                                                                                                                                                                              | n (%), except where indicated                                                                                                                                                                                                                                                                         |
|-------------------------------------------------------------------------------------------------------------------------------------------------------------------------------------------------------------------------------------------------------------------------------------------------------------------------------------------------------------------------------------------------------------------------------------------------------------------------------------------------------------------------------------------------------------------------------------------------------------------------------------------------------|-------------------------------------------------------------------------------------------------------------------------------------------------------------------------------------------------------------------------------------------------------------------------------------------------------|
| <p>What forms of patient and family-centered care practices are currently available in your ICU? n=338</p> <ul style="list-style-type: none"> <li>Patient/family participation during rounds</li> <li>Patient and family care conferences</li> <li>Open or non-restricted visitation</li> <li>Informational resources</li> <li>Family presence during resuscitation</li> <li>Pet therapy</li> <li>Patient and family diaries</li> <li>Music therapy</li> <li>Patient and family advisory group</li> <li>Other integrative therapies</li> <li>Family presence during invasive procedures</li> <li>Post-ICU clinic</li> <li>Other not listed</li> </ul> | <ul style="list-style-type: none"> <li>274 (81.1)</li> <li>240 (71.0)</li> <li>234 (69.2)</li> <li>213 (63.0)</li> <li>191 (56.5)</li> <li>139 (41.1)</li> <li>129 (38.2)</li> <li>119 (35.2)</li> <li>61 (18.0)</li> <li>49 (14.5)</li> <li>47 (13.9)</li> <li>34 (10.1)</li> <li>8 (2.4)</li> </ul> |
| <p>There is a functioning patient and family advisory council (e.g. meets regularly, at least quarterly, and reports to senior administration), n=303</p> <ul style="list-style-type: none"> <li>1 (Not at all)</li> <li>2</li> <li>3 (OK)</li> <li>4</li> <li>5 (Very well)</li> </ul>                                                                                                                                                                                                                                                                                                                                                               | <ul style="list-style-type: none"> <li>129 (42.6)</li> <li>40 (13.2)</li> <li>76 (25.1)</li> <li>27 (8.9)</li> <li>31 (10.2)</li> </ul>                                                                                                                                                               |
| <p>Patients and families serve on hospital committees and task forces, n=297</p> <ul style="list-style-type: none"> <li>1 (Not at all)</li> <li>2</li> <li>3 (OK)</li> <li>4</li> <li>5 (Very well)</li> </ul>                                                                                                                                                                                                                                                                                                                                                                                                                                        | <ul style="list-style-type: none"> <li>159 (53.5)</li> <li>54 (18.2)</li> <li>56 (18.9)</li> <li>18 (6.1)</li> <li>10 (3.4)</li> </ul>                                                                                                                                                                |
| <p>Family members are not viewed as visitors; they are always welcome to be with the patient in accordance with patient preference, n=313</p> <ul style="list-style-type: none"> <li>1 (Not at all)</li> <li>2</li> <li>3 (OK)</li> <li>4</li> <li>5 (Very well)</li> </ul>                                                                                                                                                                                                                                                                                                                                                                           | <ul style="list-style-type: none"> <li>10 (3.2)</li> <li>11 (3.5)</li> <li>84 (26.8)</li> <li>84 (26.8)</li> <li>124 (39.6)</li> </ul>                                                                                                                                                                |
| <p>Families can remain with the patient during nurse change of shift, in accordance with patient preference, n=308</p> <ul style="list-style-type: none"> <li>1 (Not at all)</li> <li>2</li> <li>3 (OK)</li> <li>4</li> <li>5 (Very well)</li> </ul>                                                                                                                                                                                                                                                                                                                                                                                                  | <ul style="list-style-type: none"> <li>28 (9.1)</li> <li>24 (7.8)</li> <li>37 (12.0)</li> <li>53 (17.2)</li> <li>166 (53.9)</li> </ul>                                                                                                                                                                |

|                                                                                                                                                                                                                                                                               |                                                                                      |
|-------------------------------------------------------------------------------------------------------------------------------------------------------------------------------------------------------------------------------------------------------------------------------|--------------------------------------------------------------------------------------|
| <p>During rounds, in accordance with patient preferences, families can remain with the patient, n=308</p> <p>1 (Not at all)</p> <p>2</p> <p>3 (OK)</p> <p>4</p> <p>5 (Very well)</p>                                                                                          | <p>2 (0.6)</p> <p>2 (0.6)</p> <p>26 (8.4)</p> <p>44 (14.3)</p> <p>234 (76.0)</p>     |
| <p>During rounds, in accordance with patient preferences, families can participate with rounds, n=308</p> <p>1 (Not at all)</p> <p>2</p> <p>3 (OK)</p> <p>4</p> <p>5 (Very well)</p>                                                                                          | <p>4 (1.3)</p> <p>10 (3.2)</p> <p>45 (14.6)</p> <p>62 (20.1)</p> <p>187 (60.7)</p>   |
| <p>Patients and families are viewed as integral members of the healthcare team, n=305</p> <p>1 (Not at all)</p> <p>2</p> <p>3 (OK)</p> <p>4</p> <p>5 (Very well)</p>                                                                                                          | <p>7 (2.3)</p> <p>17 (5.6)</p> <p>82 (26.9)</p> <p>76 (24.9)</p> <p>123 (40.3)</p>   |
| <p>Patients and families have the opportunity to participate in interdisciplinary meetings to plan care, n=303</p> <p>1 (Not at all)</p> <p>2</p> <p>3 (OK)</p> <p>4</p> <p>5 (Very well)</p>                                                                                 | <p>13 (4.3)</p> <p>21 (6.9)</p> <p>68 (22.4)</p> <p>77 (25.4)</p> <p>124 (40.9)</p>  |
| <p>There are systems in place to encourage communication among patients, families, and staff (e.g. chart, email, bulletin or white boards in patients' room, pagers, telephone contact), n=302</p> <p>1 (Not at all)</p> <p>2</p> <p>3 (OK)</p> <p>4</p> <p>5 (Very well)</p> | <p>11 (3.6)</p> <p>21 (7.0)</p> <p>86 (28.5)</p> <p>84 (27.8)</p> <p>100 (33.1)</p>  |
| <p>There is open disclosure, both in written policy and actual practice by staff, with the patient and family regarding all errors, whether or not adverse events occur, n=296</p> <p>1 (Not at all)</p> <p>2</p> <p>3 (OK)</p> <p>4</p> <p>5 (Very well)</p>                 | <p>21 (7.1)</p> <p>38 (12.8)</p> <p>117 (39.5)</p> <p>61 (20.6)</p> <p>59 (19.9)</p> |
| <p>Patients and families have email access to clinicians, n=290</p> <p>1 (Not at all)</p>                                                                                                                                                                                     | <p>140 (48.3)</p>                                                                    |

|                                                                                                                       |            |
|-----------------------------------------------------------------------------------------------------------------------|------------|
| 2                                                                                                                     | 69 (23.8)  |
| 3 (OK)                                                                                                                | 56 (19.3)  |
| 4                                                                                                                     | 10 (3.4)   |
| 5 (Very well)                                                                                                         | 15 (5.2)   |
| Patients and families have telephone access to clinicians, n=295                                                      |            |
| 1 (Not at all)                                                                                                        | 62 (21.0)  |
| 2                                                                                                                     | 58 (19.7)  |
| 3 (OK)                                                                                                                | 96 (32.5)  |
| 4                                                                                                                     | 45 (15.3)  |
| 5 (Very well)                                                                                                         | 34 (11.5)  |
| Policies and practices encourage patient and family involvement in decision making regarding their health care, n=298 |            |
| 1 (Not at all)                                                                                                        | 2 (0.7)    |
| 2                                                                                                                     | 9 (3)      |
| 3 (OK)                                                                                                                | 32 (27.5)  |
| 4                                                                                                                     | 86 (28.9)  |
| 5 (Very well)                                                                                                         | 119 (39.9) |
| Individualized and understandable follow up instructions are provided to patients from inpatient areas, n=297         |            |
| 1 (Not at all)                                                                                                        | 11 (3.7)   |
| 2                                                                                                                     | 19 (6.4)   |
| 3 (OK)                                                                                                                | 106 (35.7) |
| 4                                                                                                                     | 94 (31.6)  |
| 5 (Very well)                                                                                                         | 67 (22.6)  |
| Written information is provided in primary languages of patients and families served by the hospital, n=297           |            |
| 1 (Not at all)                                                                                                        | 12 (4.0)   |
| 2                                                                                                                     | 34 (11.4)  |
| 3 (OK)                                                                                                                | 110 (37.0) |
| 4                                                                                                                     | 72 (24.2)  |
| 5 (Very well)                                                                                                         | 69 (23.2)  |
| Trained interpreters are available, n=298                                                                             |            |
| 1 (Not at all)                                                                                                        | 10 (3.4)   |
| 2                                                                                                                     | 29 (9.7)   |
| 3 (OK)                                                                                                                | 81 (27.2)  |
| 4                                                                                                                     | 67 (22.5)  |
| 5 (Very well)                                                                                                         | 111 (37.2) |
| A range of informational and educational programs and materials are available to patients and families, n=293         |            |
| 1 (Not at all)                                                                                                        | 14 (4.8)   |
| 2                                                                                                                     | 29 (9.9)   |
| 3 (OK)                                                                                                                | 107 (36.5) |
| 4                                                                                                                     | 76 (25.9)  |
| 5 (Very well)                                                                                                         | 67 (22.9)  |

|                                                                                                                                                                                                                        |                                                                           |
|------------------------------------------------------------------------------------------------------------------------------------------------------------------------------------------------------------------------|---------------------------------------------------------------------------|
| <p>The ICU's information and educational materials reinforce the belief that patients and families are essential members of the health team, n=294</p> <p>1 (Not at all)<br/>2<br/>3 (OK)<br/>4<br/>5 (Very well)</p>  | <p>13 (4.4)<br/>30 (10.2)<br/>114 (38.8)<br/>64 (21.8)<br/>73 (24.8)</p>  |
| <p>Employees ask patients to identify family members or other support people who will participate in care, n=294</p> <p>1 (Not at all)<br/>2<br/>3 (OK)<br/>4<br/>5 (Very well)</p>                                    | <p>3 (1)<br/>5 (1.7)<br/>80 (27.2)<br/>77 (26.2)<br/>129 (43.9)</p>       |
| <p>Staff or volunteer support is available to ensure that visits by children are positive experiences, n=292</p> <p>1 (Not at all)<br/>2<br/>3 (OK)<br/>4<br/>5 (Very well)</p>                                        | <p>67 (22.9)<br/>55 (18.8)<br/>93 (31.8)<br/>37 (12.7)<br/>40 (13.7)</p>  |
| <p>A designated staff member or volunteer is available to assure families and provide updates on patient status during surgery or procedures, n=289</p> <p>1 (Not at all)<br/>2<br/>3 (OK)<br/>4<br/>5 (Very well)</p> | <p>34 (11.8)<br/>48 (16.6)<br/>115 (39.8)<br/>38 (13.1)<br/>54 (18.7)</p> |
| <p>There is the option of a private room for each patient, n=296</p> <p>1 (Not at all)<br/>2<br/>3 (OK)<br/>4<br/>5 (Very well)</p>                                                                                    | <p>7 (2.4)<br/>6 (2)<br/>15 (5.1)<br/>15 (5.1)<br/>253 (85.5)</p>         |
| <p>There is comfortable sleeping space for a family member in the patient's room, n=295</p> <p>1 (Not at all)<br/>2<br/>3 (OK)<br/>4<br/>5 (Very well)</p>                                                             | <p>69 (23.4)<br/>25 (8.5)<br/>65 (22)<br/>31 (10.5)<br/>105 (35.6)</p>    |

|                                                                                                                              |                                                               |
|------------------------------------------------------------------------------------------------------------------------------|---------------------------------------------------------------|
| There is a private consultation room, n=296<br>1 (Not at all)<br>2<br>3 (OK)<br>4<br>5 (Very well)                           | 15 (5.1)<br>6 (2)<br>46 (15.5)<br>46 (15.5)<br>183 (61.8)     |
| There is a family lounge, n=297<br>1 (Not at all)<br>2<br>3 (OK)<br>4<br>5 (Very well)                                       | 9 (3)<br>9 (3)<br>60 (20.2)<br>51 (17.2)<br>168 (56.6)        |
| Families have access to kitchen facilities, n=295<br>1 (Not at all)<br>2<br>3 (OK)<br>4<br>5 (Very well)                     | 126 (42.7)<br>51 (17.3)<br>58 (19.7)<br>25 (8.5)<br>35 (11.9) |
| Families have access to nutritious snacks, n=297<br>1 (Not at all)<br>2<br>3 (OK)<br>4<br>5 (Very well)                      | 91 (30.6)<br>63 (21.2)<br>72 (24.2)<br>30 (10.1)<br>41 (13.8) |
| Families have access to laundry facilities, n=293<br>1 (Not at all)<br>2<br>3 (OK)<br>4<br>5 (Very well)                     | 226 (77.1)<br>34 (11.6)<br>21 (7.2)<br>3 (1)<br>9 (3.1)       |
| Families have access to a place for prayer or quiet reflection, n=295<br>1 (Not at all)<br>2<br>3 (OK)<br>4<br>5 (Very well) | 10 (3.4)<br>12 (4.1)<br>57 (19.3)<br>44 (14.9)<br>172 (58.3)  |

\*All data reflects US sites.
