# Supplementary material for: The Initial Impact of the Coronavirus Disease 2019 Pandemic on ICU Family Engagement: Lessons Learned From a Collaborative of 27 ICUs
Source: PubMed Central journal article supplement — Crit Care Explor. 2021 Apr 2;3(4):e0401. doi: 10.1097/CCE.0000000000000401 (PMC8021347; doi:10.1097/cce.0000000000000401), 2021-04-02
Supplement: cc9-3-e0401-s008.pdf [file cc9-3-e0401-s008.pdf]

**Supplemental Digital Content 8.** Visitor restriction policies and visitor screening (n=22)

| <b>Survey item</b>                                                                                               | <b>n (%)</b>  |
|------------------------------------------------------------------------------------------------------------------|---------------|
| <i>Requirements for visitors when policies were most restrictive</i>                                             |               |
| No visitors under any circumstance                                                                               | 2 (9.1)       |
| Exceptions to visitor restriction only allowed for certain patient categories                                    | 20 (91.0)     |
| Mask requirement                                                                                                 | 20/20 (100.0) |
| No COVID-specific symptoms or exposures                                                                          | 20/20 (100.0) |
| No general signs of illness                                                                                      | 20/20 (100.0) |
| <i>Visitor exceptions allowed when policies were most restrictive</i>                                            |               |
| End-of-life care                                                                                                 | 20 (91.0)     |
| Policy specified $\leq 2$ visitors at a time                                                                     | 13/20 (65.0)  |
| Pediatric and/or neonatal care                                                                                   | 12 (54.5)     |
| Policy specified 1 visitor at a time                                                                             | 10/12 (83.3)  |
| Obstetric care                                                                                                   | 10 (45.5)     |
| Policy specified 1 visitor at a time                                                                             | 7/10 (70.0)   |
| Patients with intellectual and/or developmental disabilities                                                     | 6 (27.3)      |
| Policy specified 1 visitor at a time                                                                             | 3/6 (50.0)    |
| All surgical procedures                                                                                          | 5 (22.7)      |
| Patients with psychiatric conditions                                                                             | 2 (9.1)       |
| Patients generally lacking decisional capacity                                                                   | 1 (4.5)       |
| Policy specified 1 visitor at a time                                                                             | 1/1 (100.0)   |
| Other (e.g., day of discharge planning)                                                                          | 1 (4.5)       |
| <i>Current visitor restriction policies</i>                                                                      |               |
| No visitors under any circumstance                                                                               | 0 (0.0)       |
| *Exceptions to visitor restriction only allowed for certain patient categories                                   | 2 (9.1)       |
| All non-COVID patients allowed visitors, but number per patient and visitation hours restricted                  | 20 (90.9)     |
| Mask requirement                                                                                                 | 22 (100.0)    |
| No COVID-specific symptoms or exposures                                                                          | 22 (100.0)    |
| No general signs of illness                                                                                      | 22 (100.0)    |
| <i>Details of current policies allowing visitors for all non-COVID patients</i>                                  | n=20          |
| 1 visitor permitted for non-COVID patients during limited hours                                                  | 16 (80.0)     |
| 2 visitors permitted for non-COVID patients during limited hours                                                 | 4 (20.0)      |
| Patients for whom extended visitation hours, increased number of visitors, or additional liberties are permitted |               |
| End-of-life care                                                                                                 | 12 (60.0)     |
| Pediatric                                                                                                        | 10 (50.0)     |
| Obstetric care                                                                                                   | 7 (35.5)      |
| All surgical procedures                                                                                          | 7 (35.5)      |
| Intellectual and/or developmental disabilities                                                                   | 4 (20.0)      |
| Patients generally lacking decisional capacity                                                                   | 2 (10.0)      |
| Other (e.g., day of discharge planning)                                                                          | 10 (50.0)     |
| <i>Knowledge of when hospital will further relax visitor restrictions</i>                                        |               |
| Yes, in the next few weeks                                                                                       | 3 (13.6)      |
| No                                                                                                               | 19 (86.4)     |

|                                                                        |            |
|------------------------------------------------------------------------|------------|
| <i>Required protocol for screening visitors</i>                        |            |
| Self-reported questionnaire/verbal screening for symptoms and contacts | 22 (100.0) |
| Temperature test administered by hospital                              | 20 (90.9)  |
| On-site COVID-19 testing for all visitors                              | 1 (4.5)    |
| Other                                                                  | 1 (4.5)    |
| <i>Masks and personal protective equipment provided to visitors</i>    |            |
| Yes                                                                    | 14 (63.6)  |
| Yes, for visitors in particular units or under certain circumstances   | 4 (18.2)   |
| No                                                                     | 4 (18.2)   |

\*These 2 sites both reported current exceptions in place for end-of-life care, pediatric/neonatal care, and obstetric care. One site reported allowing 1 visitor for patients with intellectual and/or development disabilities, and 1 site reported allowing 1 visitor for patients undergoing a surgical procedure.
